# Supplementary material
Source: Royal Society of Chemistry journal article supplement (doi:10.1039/d6tb00490c)
Supplement: d6tb00490c5.pdf [file d6tb00490c5.pdf]

## Supplementary Information

### Hierarchical Stabilization of Bioactive Hydrogels by Multi-Arm Peptide–Polymer Supramolecular Staples

*Somayeh Taheri<sup>1</sup>, Md Shariful Islam<sup>1</sup>, Riddhesh Bhadresh Doshi<sup>1</sup>, Jitendra Mata<sup>1,2</sup>, Ashley K. Nguyen<sup>1</sup>, Juanfang Ruan<sup>3</sup>, Richard Tilley<sup>1,3</sup>, Kristopher A. Kilian<sup>1,3,4\*</sup>*

<sup>1</sup>School of Chemistry, Australian Centre for NanoMedicine, University of New South Wales  
Sydney, New South Wales, Australia

<sup>2</sup>Australian Centre for Neutron Scattering, Australian Nuclear Science and Technology Organization, Lucas Heights,  
NSW, 2234, Australia

<sup>3</sup>Electron Microscope Unit, Mark Wainwright Analytical Centre, University of New South Wales (UNSW Sydney),  
Sydney, NSW 2052, Australia

<sup>4</sup>School of Materials Science and Engineering, University of New South Wales (UNSW), Sydney, New South Wales,  
Australia

\*Corresponding Author: [k.kilian@unsw.edu.au](mailto:k.kilian@unsw.edu.au)

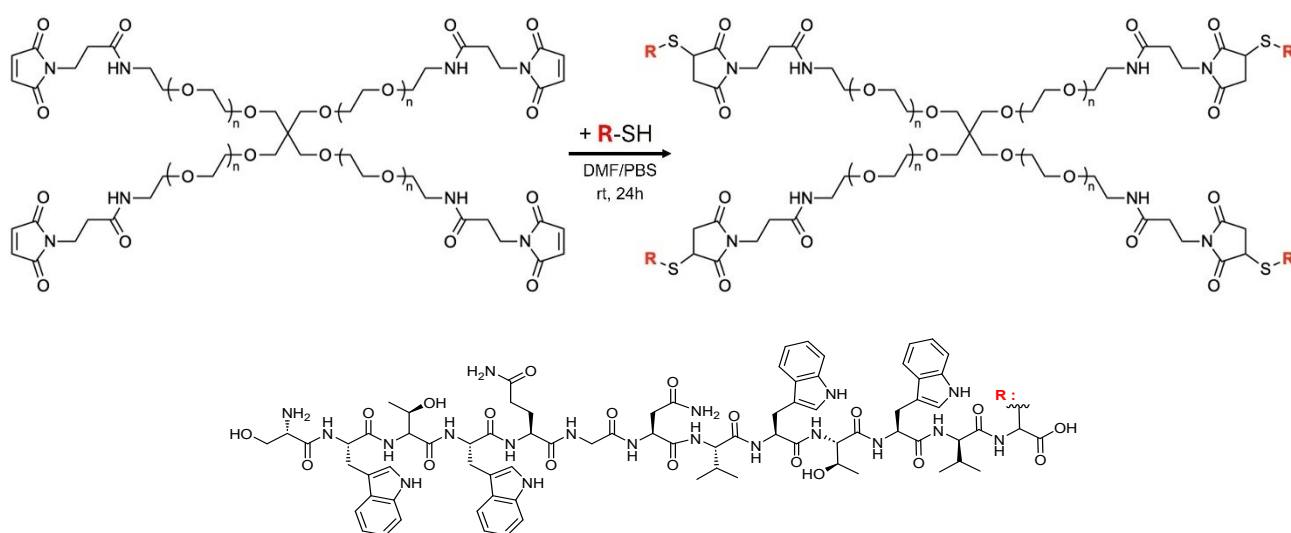

**Supplementary Figure 1.** Reaction of thiols in the cysteine residues of Trpzip peptides with 4 Arm-PEG-MAL

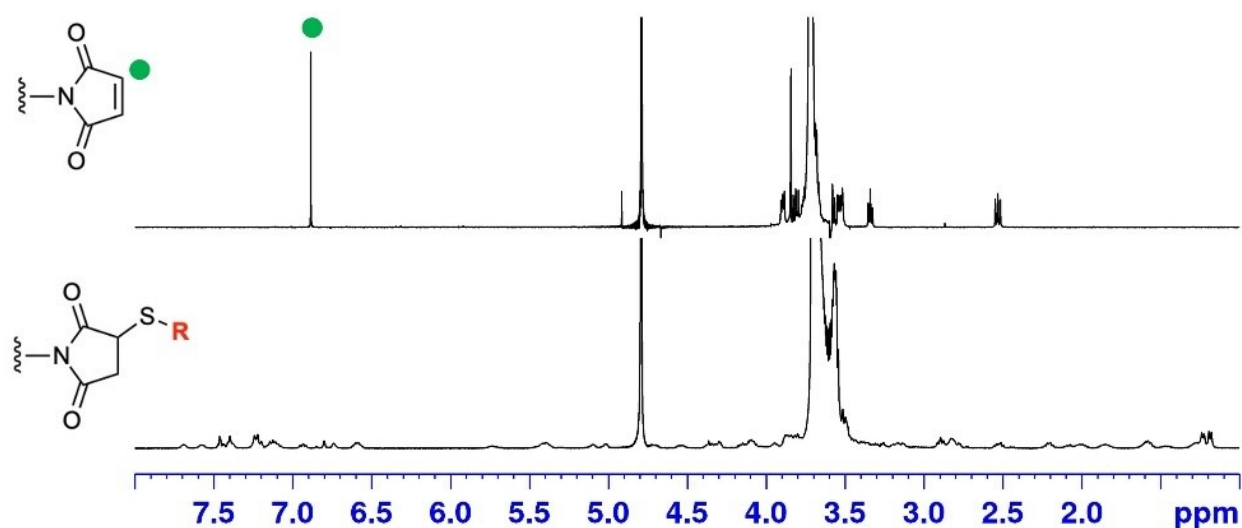

**Supplementary Figure 2.** <sup>1</sup>H NMR spectrum of 4 arm PEG-Mal (top) and Trpzip\_q5\_cys / 4-arm PEG conjugate (bottom).

**Supplementary Table 1.** Material compositions of hydrogel samples.

| Sample code     | Trpzip: Trpzip-PEG<br>Conjugate ratio (w/w) | Trpzip concentration<br>(w/v, mg in v (μl of final<br>volume of the hydrogel)) | Trpzip-PEG concentration<br>(w/v, mg in v (μl of final volume<br>of the hydrogel)) |
|-----------------|---------------------------------------------|--------------------------------------------------------------------------------|------------------------------------------------------------------------------------|
| 1% T            | -                                           | 0.01×v                                                                         | -                                                                                  |
| 1% T+ C (90:10) | 90:10                                       | 0.01×v                                                                         | 0.01×v×10/90                                                                       |
| 1% T+ C (80:20) | 80:20                                       | 0.01×v                                                                         | 0.01×v×20/80                                                                       |
| 1% T+ C (60:40) | 60:40                                       | 0.01×v                                                                         | 0.01×v×40/60                                                                       |

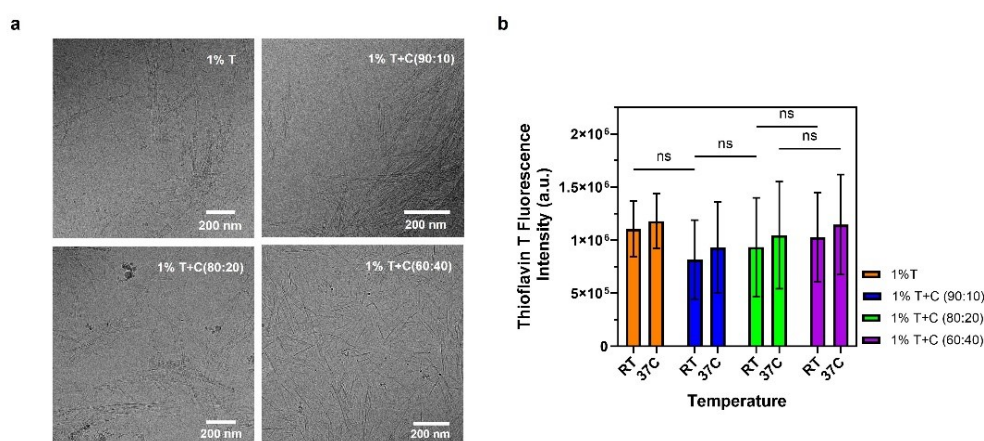

**Supplementary Figure 3. Physicochemical characterization of Trpzip/Trpzip-PEG hydrogels.** **a.** Cryo-TEM micrographs of 1% (w/v) Trpzip hydrogels and co-assembled systems with varying ratios of Trpzip to Trpzip-PEG: 90:10, 80:20, and 60:40 acquired 10 h post-gelation at 37 °C, revealing the nanoscale network morphology **b.** Thioflavin T fluorescence intensity of the corresponding hydrogels measured at room temperature (RT) and 37 °C, indicating the extent of  $\beta$ -sheet formation. Data are presented as mean  $\pm$  standard deviation, with statistical analysis showing no significant differences (ns) between groups.

**Supplementary Table 2.** Quantitative Morphology of Filamentous Structure in Cryo-Electron Tomograms.

| Sample Codes                      | 1% T    | 1% T+C<br>(90:10) | 1% T+C<br>(80:20)  | 1% T+C<br>(60:40) |
|-----------------------------------|---------|-------------------|--------------------|-------------------|
| Length of ribbon bundle (nm)      | 238-486 | 321-700           | 115-373<br>200-536 | 350               |
| Thickness of bundle (nm)          | 14-78   | 13.6-42           | 19- 65             | 16.2-19.8         |
| Length of single filament (nm)    | -       | -                 | -                  | 55.9-200          |
| Thickness of single filament (nm) | -       | -                 | -                  | 7.24-7.75         |

**Note:** Values represent measurements of individual filaments or bundle structures extracted from cryo-TEM tomograms and therefore reflect the distribution of observed sizes within each sample. Discrete values correspond to measurements of individual structures rather than distinct structural populations.

**Supplementary Table 3.** Parameter values of 0.5% Trpzip hydrogel fitted with Power Law + Flexible cylinder model.

| Hydrogel |          | Background | Power Scale | Power exponent | Flexible Cylinder Scale | Flexible Cylinder length, nm | Kuhn length, nm | Radius, nm | Polymer SLD | D2O SLD | Kuhn Length poly dispersity | Radius poly dispersity |
|----------|----------|------------|-------------|----------------|-------------------------|------------------------------|-----------------|------------|-------------|---------|-----------------------------|------------------------|
| 0.5%T    | Absolute | 1.06E-02   | 8.58E-09    | 3.58           | 7.06E-04                | 1000                         | 6.50            | 2.23       | 3.69        | 6.39    | 0.1                         | 0.1                    |
|          | Error    | ±6.93E-05  | ±2.22E-9    | ±3.97E-02      | ±7.41E-06               |                              | ±0.23           | ±0.02      |             |         |                             |                        |

**Supplementary Table 4.** Parameter values of Trpzip/Trpzip-PEG hydrogel fitted with Power Law and Ellipsoid model.

| Hydrogel        |          | Background | Power Scale | Power exponent | Ellipsoid Scale | Polar Radius, nm | Equatorial Radius, nm | Peptide SLD | D <sub>2</sub> O SLD |
|-----------------|----------|------------|-------------|----------------|-----------------|------------------|-----------------------|-------------|----------------------|
| 0.5T+ C (90:10) | Absolute | 6.76E-03   | 8.30E-05    | 2.37           | 6.10E-04        | 6.76             | 45.74                 | 3.29        | 6.39                 |
|                 | Error    | ±2.09E-05  | ±7.12E-07   | ±2.62E-03      | ±5.03E-6        | ±0.03            | ±0.57                 |             |                      |
| 0.5T+ C (80:20) | Absolute | 6.37E-03   | 8.74E-05    | 2.38           | 6.36E-04        | 7.954            | 48.24                 | 2.95        | 6.39                 |
|                 | Error    | ±2.08E-05  | ±7.24E-07   | ±2.65E-03      | ±4.17E-06       | ±0.03            | ±0.48                 |             |                      |
| 0.5T+ C (60:40) | Absolute | 8.83E-03   | 1.63E-04    | 2.27           | 8.15E-04        | 9.04             | 58.03                 | 2.43        | 6.39                 |
|                 | Error    | ±2.29E-05  | ±1.60E-06   | ±3.60E-03      | ±4.45E-06       | ±0.02            | ±0.44                 |             |                      |

**Supplementary Table 5.** Parameter values obtained from Power-law fitting of USANS data for Trpzip/Trpzip-PEG hydrogels at 90:10, 80:20, and 60:40 formulations.

| Hydrogel        |          | Scale    | Background | Power |
|-----------------|----------|----------|------------|-------|
| 0.5T+C (90:10)  | Absolute | 3.17E-07 | 6.76E-03   | 2.98  |
|                 | Error    | 3.60E-08 |            | 0.01  |
| 0.5T+ C (80:20) | Absolute | 2.61E-07 | 6.37E-03   | 3.03  |
|                 | Error    | 2.57E-08 |            | 0.01  |
| 0.5T+ C (60:40) | Absolute | 3.17E-07 | 8.83E-03   | 3.07  |
|                 | Error    | 2.86E-08 |            | 0.01  |

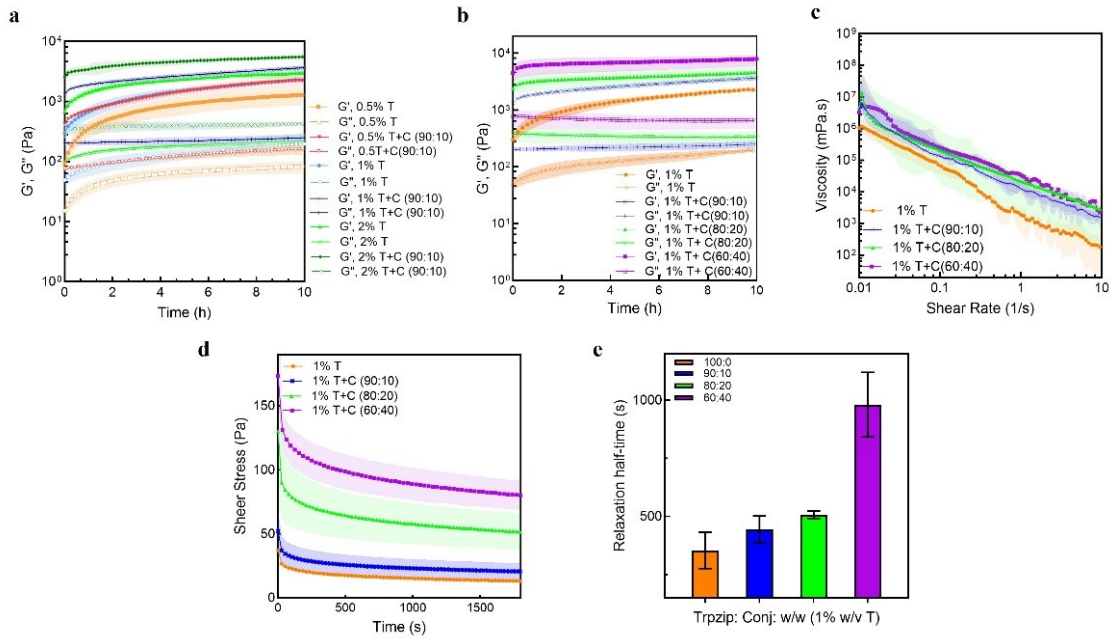

**Supplementary Figure 4. The Mechanical properties of Trpzip-based hydrogels.** **a**, **b** Oscillatory time sweep measurements of the storage modulus ( $G'$ ) and loss modulus ( $G''$ ) of 0.5%, 1% and 2% w/v of Trpzip-based hydrogels **c** Viscosity flow curves of 1% w/v Trpzip-based hydrogels conducted using a logarithmic ramping rate from 0.01 to 10  $s^{-1}$  shear rate over 10 min **d** Stress-relaxation profiles of 1% w/v Trpzip hydrogel and its hydrogels with Trpzip-PEG performed at 5% strain for 0.5 h **e** Relaxation half-time ( $\tau_{1/2}$ ) of 1% w/v Trpzip-based hydrogels.
